# Supplementary material for: Secukinumab Demonstrates Significantly Lower Immunogenicity Potential Compared to Ixekizumab
Source: Springer Nature journal article supplement (doi:10.1007/s13555-018-0220-y), 2018-02-01
Supplement: MOESM1 [file 15432808]

Supplementary figures and tables

Supplementary Figure 1. mAb specific T cell lines. (A) secukinumab (B) ustekinumab, (C) adalimumab and (D) ixekizumab

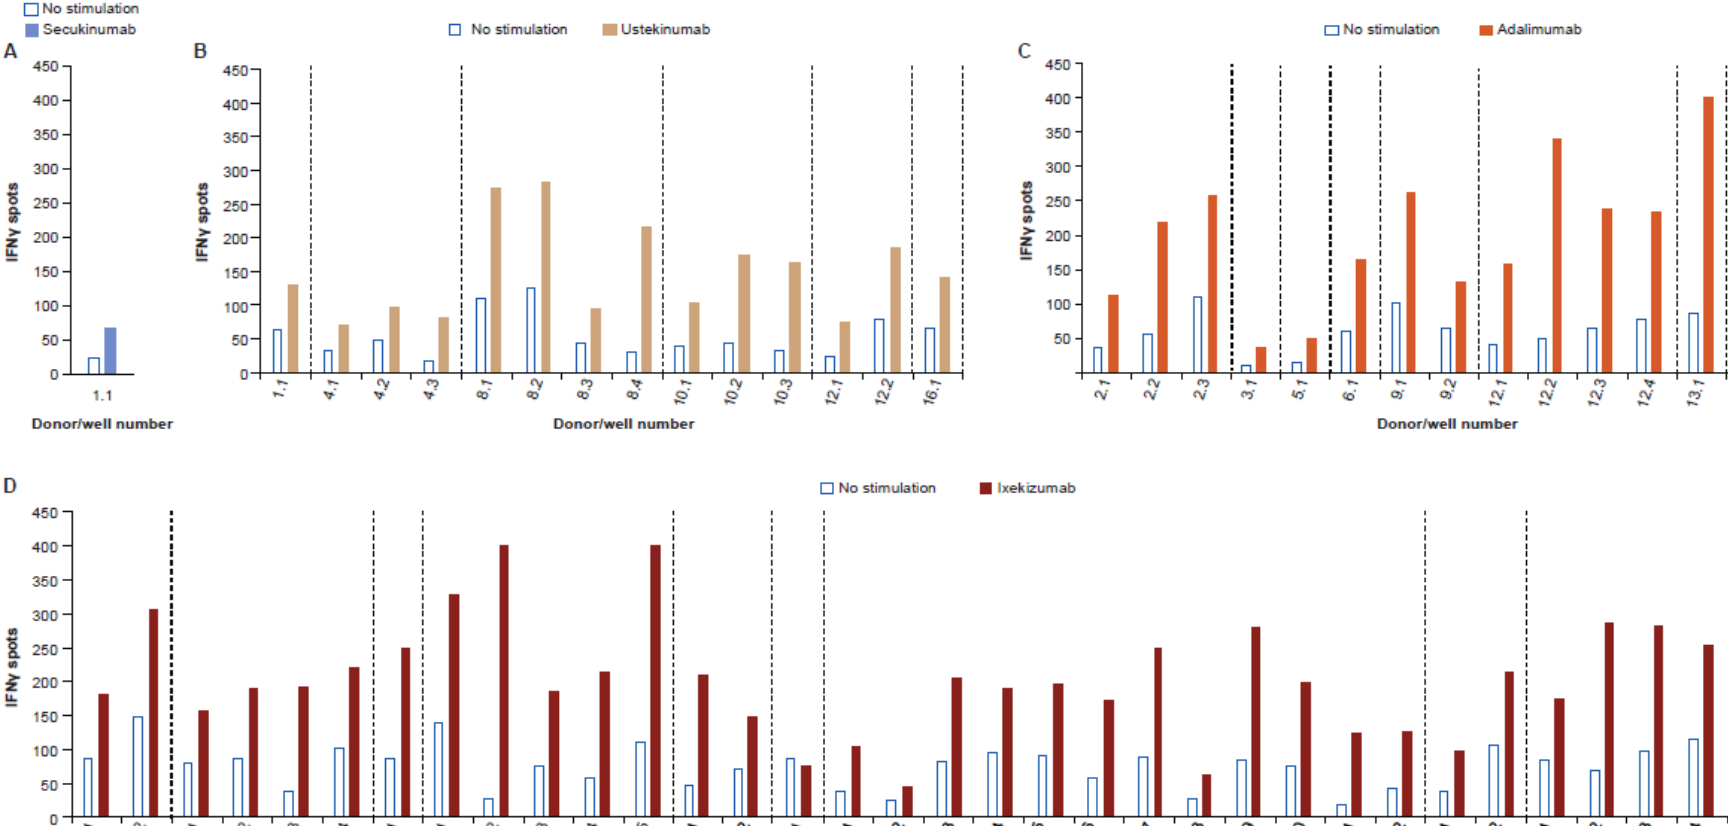

Dotted lines separate different clones

T cell lines were raised against the individual mAbs. All the T cell lines (T cells growing in the same well) were submitted to IFN $\gamma$  Elispot in the absence (blank) or in the presence of the appropriate mAb (grey). Only T cell lines found specific for the mAbs are shown.

**Supplementary Table 1:** Donor HLA-DRB1\* haplotypes at 4 digit resolution

| Donor | HLA-DRB1*<br>(allele 1) | HLA-DRB1*<br>(allele 2) |
|-------|-------------------------|-------------------------|
| 1     | <b>03:01</b>            | <b>14:04</b>            |
| 2     | <b>01:01</b>            | <b>04:03</b>            |
| 3     | <b>07:10</b>            | <b>13:01</b>            |
| 4     | <b>01:02</b>            | <b>07:01</b>            |
| 5     | <b>13:01</b>            | <b>16:01</b>            |
| 6     | <b>11:01</b>            | <b>11:04</b>            |
| 7     | <b>01:01</b>            | <b>08:01</b>            |
| 8     | <b>04:04</b>            | <b>15:01</b>            |
| 9     | <b>15:01</b>            | <b>16:01</b>            |
| 10    | <b>04:01</b>            | <b>07:01</b>            |
| 11    | <b>01:01</b>            | <b>01:02</b>            |
| 12    | <b>03:01</b>            | <b>13:01</b>            |
| 13    | <b>13:01</b>            | <b>15:01</b>            |
| 14    | <b>07:01</b>            | <b>07:01</b>            |
| 15    | <b>03:01</b>            | <b>15:01</b>            |
| 16    | <b>03:01</b>            | <b>11:04</b>            |

All the samples were genotyped for HLA-DRB1\* using the Gold SSP DRB typing kit (One lambda) after DNA extraction from PBMCs with NucleoSpin Blood QuickPure Kit (Macherey-Nagel).
